# Supplementary material for: ‘The nurse did not even greet me’: how informed versus non-informed patients evaluate health systems responsiveness in South Africa
Source: PubMed Central journal article supplement — BMJ Glob Health. 2021 Apr 23;6(4):e004360. doi: 10.1136/bmjgh-2020-004360 (PMC8074562; doi:10.1136/bmjgh-2020-004360), 2021-04-23
Supplement: bmjgh-2020-004360supp001.pdf [file bmjgh-2020-004360supp001.pdf]

Table S-1: **Linear regression results examining complementarity of non-clinical variables with clinical variables**

| Variables                           | Dependent variable: |         | Satisfaction with general care |         |
|-------------------------------------|---------------------|---------|--------------------------------|---------|
|                                     | RP                  |         | SP                             |         |
| <b>Respect and dignity</b>          |                     |         |                                |         |
| Welcome                             | 0.299***            | (0.049) | 0.148**                        | (0.063) |
| General attitude                    | 0.224***            | (0.048) | 0.055                          | (0.075) |
| <b>Quality of basic amenities</b>   |                     |         |                                |         |
| Cleanliness                         | -0.012              | (0.036) | 0.57                           | (0.049) |
| <b>Confidentiality</b>              |                     |         |                                |         |
| Level of privacy                    | 0.069               | (0.044) | 0.163***                       | (0.047) |
| <b>Effective communication</b>      |                     |         |                                |         |
| Understanding health problem        | 0.091               | (0.044) | 0.302***                       | (0.067) |
| Explaining health condition         | 0.142***            | (0.038) | 0.286***                       | (0.069) |
| <b>Clinical quality variable</b>    |                     |         |                                |         |
| Medical history                     | 0.028               | (0.029) | 0.044                          | (0.047) |
| <b>Socio-demographic</b>            |                     |         |                                |         |
| <i>Age (Ref. 15-30 years)</i>       |                     |         |                                |         |
| ≥ 30 years                          | 0.021               | (0.022) | -0.008                         | (0.047) |
| <i>Gender (Ref. Male)</i>           |                     |         |                                |         |
| Female                              | 0.024               | (0.021) | -0.076                         | (0.059) |
| <i>Race (Ref. African)</i>          |                     |         |                                |         |
| Coloured                            | -0.004              | (0.033) | -0.067                         | (0.074) |
| <i>Education (Ref. &lt; Matric)</i> |                     |         |                                |         |
| Matric                              | 0.046**             | (0.022) | 0.080                          | (0.061) |
| > Matric                            | 0.031               | (0.036) | -0.102                         | (0.073) |
| <i>Province (Ref. Eastern Cape)</i> |                     |         |                                |         |
| Western Cape                        | 0.033               | (0.028) | 0.006                          | (0.058) |
| Motor vehicle or bakkie             | -0.011              | (0.027) | 0.128*                         | (0.068) |
| Fridge or freezer                   | -0.032              | (0.036) | -0.137                         | (0.117) |
| Constant                            | 0.118**             | (0.058) | 0.177                          | (0.148) |
| Clusters (facilities)               |                     | 39      |                                | 39      |
| Observations (visits)               |                     | 1021    |                                | 336     |
| R-squared                           |                     | 0.414   |                                | 0.437   |

Note: Robust standard errors adjusted for clustering at facility level shown in parentheses. Significance at \*\*\* 1% level \*\* 5% level \* 10% level. Control variables include: age, gender, race, education, province, motor vehicle or bakkie, and fridge or freezer.
